# Supplementary material for: Enhanced photovoltaic response of the first polyoxometalate-modified zinc oxide photoanode for solar cell application
Source: Royal Society of Chemistry journal article supplement (doi:10.1039/c2jm16018h), 2012-01-01
Supplement: c2jm16018h.pdf [file c2jm16018h.pdf]

## Electronic Supplementary Information

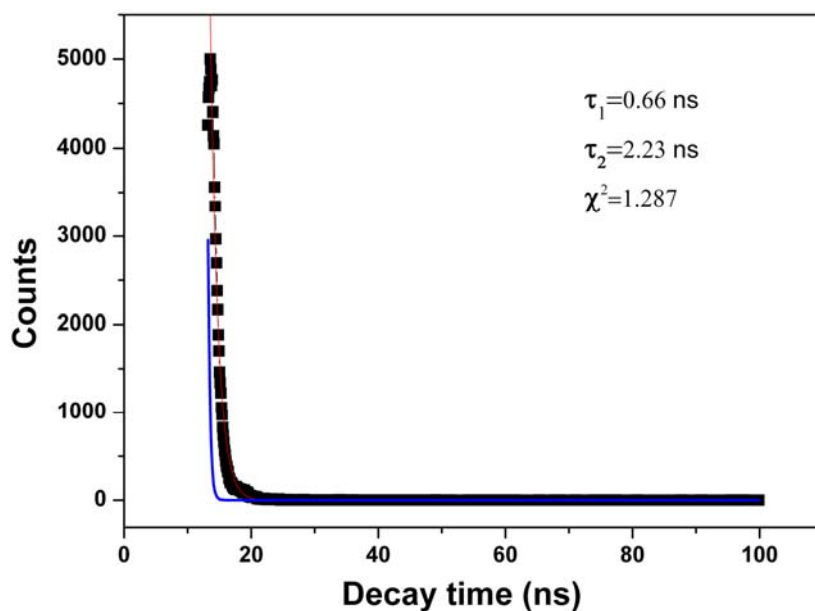

**Figure S1.** Fluorescence decay curves for ZnO film (the black blocks represent experimental data, the solid red line represents fitting results, and the solid blue line represents hydrogen background). The emission decay lifetimes are  $\tau_1 = 0.66$  ns (83.37%) and  $\tau_2 = 2.23$  ns (16.63%),  $\chi^2 = 1.287$ . The luminescence lifetimes for SiW<sub>12</sub>/ZnO film are too short to be detected under the same condition.
